## PUBLISHER'S NOTE

# Expression of Concern: Association of tetraspanin CD9 with transmembrane TGF $\alpha$ confers alterations in cell-surface presentation of TGF $\alpha$ and cytoskeletal organization

Isabella Imhof, Warren J. Gasper and Rik Derynck

There is an error in *J. Cell Sci.* (2008) **121**, 2265-2274 (doi:10.1242/jcs.021717).

The journal was alerted anonymously to duplicated cell images in Fig. 6D. The authors no longer have any original data and therefore cannot supply the correct panel but do state that the conclusions of the paper are not affected by this error.

The journal is publishing this note to alert readers to the issue.

# Association of tetraspanin CD9 with transmembrane TGF $\alpha$ confers alterations in cell-surface presentation of TGF $\alpha$ and cytoskeletal organization

Isabella Imhof, Warren J. Gasper and Rik Derynck\*

Department of Cell and Tissue Biology, Program in Cell Biology, University of California–San Francisco, 513 Parnassus Avenue, San Francisco, CA 94143, USA

\*Author for correspondence (e-mail: rik.derynck@ucsf.edu)

Accepted 9 April 2008

Journal of Cell Science 121, 2265–2274 Published by The Company of Biologists 2008  
doi:10.1242/jcs.021717

## Summary

Ligand presentation is a major determinant of receptor activation. The epidermal growth factor receptor (EGFR), a tyrosine kinase receptor, is activated by growth factors of the transforming growth factor  $\alpha$  (TGF $\alpha$ ) family. The tetraspanin CD9 interacts with transmembrane TGF $\alpha$  and decreases its ectodomain shedding to release soluble TGF $\alpha$ . Here we report that CD9 has a role in the maturation of transmembrane TGF $\alpha$  and its stabilization at the cell surface, and in the cell-surface distribution in polarized epithelial cells. Furthermore, coexpression of CD9 and TGF $\alpha$  confers changes in cytoskeletal organization with a decrease in actin stress fibers and focal

adhesions, and changes in RhoA and Rac1 GTPase activity. These alterations are reversed by blocking EGFR signaling. Finally, we demonstrate changes in cell adhesion and migration resulting from coexpression of TGF $\alpha$  with CD9. These results provide insight into the role of CD9 in the presentation of TGF $\alpha$  in epithelial and carcinoma cells, whose physiology is driven by ligand-induced EGFR activation.

Key words: Epithelial cells, Tetraspanin, Transforming growth factor  $\alpha$

## Introduction

Autocrine and paracrine signaling mechanisms mediate the interactions of growth and differentiation factors with their receptors, which drive normal development and a variety of developmental diseases such as cancers (Ariztia et al., 2006). Whereas the nature of the ligand defines the interaction with its cognate receptor and the receptor-initiated signaling mechanisms, the mode of ligand presentation is also a major determinant of receptor activation and has a major role in the biological responses. Thus, proteins that interact with the ligands have been shown to define the affinities of the ligand-receptor interactions, as well as receptor internalization and routing. Although the roles of ligand presentation are apparent for a variety of receptor classes, they are perhaps best illustrated for transmembrane tyrosine-kinase receptors and tyrosine-kinase-associated receptors. Some striking examples are provided by the roles of heparan sulfates and syndecans in the presentation of fibroblast growth factors (FGFs) to their cognate receptors (Guerrini et al., 2007; Horowitz et al., 2002), and the roles of the proteoglycan  $\beta$ -glycan (Esparza-Lopez et al., 2001) and the glycoprotein endoglin (Cheifetz et al., 1992) in the presentation of transforming growth factor  $\beta$  (TGF $\beta$ ) to its cell-surface receptors.

The transforming growth factor  $\alpha$  (TGF $\alpha$ ) family of growth factors represents a small family of proteins that are marked by a single 50-amino-acid-long epidermal growth factor (EGF) core domain that is the determinant of binding to EGF family receptors. TGF $\alpha$ -family proteins are expressed as type I transmembrane proteins that can undergo proteolytic cleavage to release a soluble ligand that contains the EGF core – a process called ectodomain shedding (Arribas and Borroto, 2002; Fan and Derynck, 1999). Alternative processing and heterogeneous glycosylation often occur,

thus giving rise to multiple forms of the soluble protein (Bringman et al., 1987). TGF $\alpha$  is often considered as a prototype of the TGF $\alpha$  family. Its transmembrane form gives rise to three forms of soluble TGF $\alpha$ , each of which contains the EGF core sequence that is required for EGF receptor (EGFR) activation (Bringman et al., 1987). The differential interactions of these soluble isoforms with the receptor have not been studied. Whereas soluble TGF $\alpha$  allows activation of the EGFR at a distance, transmembrane TGF $\alpha$  can only activate the EGFR in a juxtacrine manner through cell-cell contact. In addition, soluble TGF $\alpha$  induces ligand-receptor internalization, whereas such a scenario is hard to imagine for the interaction of transmembrane TGF $\alpha$  with the EGFR (Brachmann et al., 1989; Ebner and Derynck, 1991; Wong et al., 1989). Thus, the modes of action and biological effects of soluble and transmembrane TGF $\alpha$  are distinct. Despite its importance, little is known about the mechanisms that regulate the presentation of TGF $\alpha$  proteins.

Although TGF $\alpha$  is expressed in most, if not all, cells of neuroectodermal origin, its role in carcinoma progression is also well-appreciated. Indeed, most carcinomas express TGF $\alpha$ , often at increased levels in comparison with the normal cells from which they are derived. The increased TGF $\alpha$ -EGFR signaling associated with increased expression of TGF $\alpha$  and/or its receptor is thought to drive cancer progression (Holbro et al., 2003; Kenny and Bissell, 2007; Lee et al., 1995). Accordingly, clinical therapies for carcinomas are being developed based on interference with activation of the EGFR by its ligands (Dancey and Freidlin, 2003).

Transmembrane proteins in the tetraspanin family have been shown to interact with various cell-surface transmembrane proteins. Whether they have an important role in ligand presentation is not

clear. Tetraspanins are characterized by four transmembrane segments in a defined topology, with a large extracellular loop that often interacts with the ectodomain of the associated transmembrane proteins. The tetraspanins form homodimers and heterodimers, and are therefore likely to dimerize their interacting proteins. They are also thought to form – through secondary interactions – a much wider tetraspanin web that may recruit other interacting proteins, thus defining the presentation and localization of these associated proteins (Hemler, 2005; Levy and Shoham, 2005).

Among the tetraspanins, CD9 has been shown to interact with members of the TGF $\alpha$  family of growth factors, specifically TGF $\alpha$ , heparin-binding (HB)-EGF and amphiregulin (Inui et al., 1997; Shi et al., 2000). Originally identified as a surface antigen with a molecular mass of 24–27 kDa on lympho-hemopoietic cells (Kersey et al., 1981), CD9 is also widely expressed on non-hematopoietic tissues and has been implicated in a variety of biological functions including motility (Garcia-Lopez et al., 2005; Hemler, 2005; Longhurst et al., 2002). CD9 expression is often drastically reduced in various metastatic cancers, e.g. lung, colon, breast, bladder pancreatic cancer and squamous cell carcinoma, as well as malignant melanoma, and its expression levels have been inversely correlated with invasion and metastasis (Boucheix et al., 2001).

We have reported that CD9 interacts with transmembrane TGF $\alpha$  and that the interaction results in decreased TGF $\alpha$  ectodomain shedding and an increase in cell-surface transmembrane TGF $\alpha$  (Shi et al., 2000). As a consequence, TGF $\alpha$  induces EGFR activation at levels that are beyond what can be achieved by adding soluble TGF $\alpha$  to EGFR-expressing cells (Shi et al., 2000). We extended these studies and report here that CD9 is involved in the biosynthesis of transmembrane TGF $\alpha$ , its localization and stabilization at the cell surface, and the distribution of TGF $\alpha$  in polarized epithelial cells. Furthermore, coexpression of CD9 and transmembrane TGF $\alpha$  leads to distinct changes in cytoskeletal organization, such as a decrease in actin stress fibers and focal adhesions, accompanied with a change in activation of RhoA and Rac1 GTPases. These results might provide insight into the role of CD9 in the functions of TGF $\alpha$  family proteins in epithelial and carcinoma cells, whose physiology and behavior are driven by ligand-induced EGFR signaling.

## Results

### CD9 enhances TGF $\alpha$ expression at the cell surface

To examine whether CD9 expression affects the expression and localization of TGF $\alpha$ , we generated Madin-Darby canine kidney epithelial (MDCK) cells that were infected with retroviral vectors to ectopically express CD9, TGF $\alpha$  or both. MDCK cells grow in contact-inhibited monolayer cultures and appear non-transformed. Following two rounds of retroviral infection, using vectors with different selection markers and the corresponding selections, we obtained four types of cell population. Cells either expressed CD9 and TGF $\alpha$ , TGF $\alpha$  and a control vector for the CD9 plasmid, CD9 and a TGF $\alpha$  control vector, or both control vectors. The expression levels for CD9 and TGF $\alpha$  were verified by immunoblotting and immunofluorescence.

The effect of CD9 on TGF $\alpha$  expression was examined by confocal microscopy in cells grown in monolayer culture. When expressed alone, CD9 was distributed all over the cell, but was highly concentrated at sites of cell contact (Fig. 1A, top panel). When TGF $\alpha$  was expressed alone, the protein showed a perinuclear localization, consistent with its accumulation in the Golgi complex, but had little if any localization at sites of cell contacts (Fig. 1A,

middle panel). By contrast, when CD9 and TGF $\alpha$  were coexpressed, the TGF $\alpha$  protein showed dispersed staining in the cells, but colocalized with CD9 at the sites of cell contacts, whereas CD9 distribution was not changed (Fig. 1A, bottom panel). Thus our observations show that expression of CD9 together with TGF $\alpha$ , relocalizes TGF $\alpha$  from the Golgi to the cell surface and to cell-contact sites.

To further examine the effect of CD9 on the level of TGF $\alpha$  at the cell surface, cells were cooled to 4°C to slow endocytosis, and cell-surface immunofluorescence staining was performed. As controls, cells were fixed and permeabilized before immunofluorescence staining. The presence of CD9 in cells coexpressing CD9 and TGF $\alpha$  resulted in a pronounced increase in TGF $\alpha$  at the cell surface (Fig. 1B). To quantify this observation, cell-surface proteins of intact cells were labeled with biotin and analyzed by western blot. Cell-surface expression of TGF $\alpha$  was substantially increased in the three CD9-TGF $\alpha$ -expressing cell populations, when compared with cells expressing TGF $\alpha$  alone (Fig. 1C).

We have shown previously that the interaction of transmembrane TGF $\alpha$  with CD9 required the 50-amino-acid-long TGF $\alpha$  core sequence that is located in the ectodomain of transmembrane TGF $\alpha$ . Thus, TGF $\alpha$  $\Delta$ E, which has this core sequence replaced with an extracellular Myc tag, did not associate with CD9 in coimmunoprecipitation experiments (Shi et al., 2000). To test the role of the TGF $\alpha$ -CD9 association in the cell-surface presentation of transmembrane TGF $\alpha$ , we coexpressed CD9 and TGF $\alpha$  $\Delta$ E. Without CD9 co-expression, TGF $\alpha$  $\Delta$ E had a largely intracellular localization (Fig. 1D), similarly to wild-type TGF $\alpha$  (Fig. 1A). In contrast to wild-type TGF $\alpha$ , the localization of TGF $\alpha$  $\Delta$ E was not affected by co-expressing CD9 (Fig. 1D). Thus, whereas CD9 enhances the cell-surface presentation of wild-type TGF $\alpha$ , thereby resulting in co-staining of TGF $\alpha$  with CD9 at cell contacts (Fig. 1A), no such co-staining of CD9 with TGF $\alpha$  $\Delta$ E was apparent (Fig. 1D).

These results show that CD9 facilitates the transport of TGF $\alpha$  from its predominantly intracellular location to the cell surface and/or stabilizes TGF $\alpha$  at the cell surface, where the two proteins colocalize; and that this effect of CD9 depends on the association of TGF $\alpha$  with CD9.

### Processing of TGF $\alpha$ is affected by the concomitant expression of CD9

The increased levels of TGF $\alpha$  at the cell surface in the presence of CD9 suggested that CD9 might affect the maturation and processing of transmembrane TGF $\alpha$ . To test this hypothesis, we established stable derivatives of CHO cells that express TGF $\alpha$ , CD9 or both. The lack of EGFR in this cell line eliminates the possibility of endocytosis of transmembrane or soluble TGF $\alpha$  upon binding to the EGFR. The biosynthesis of TGF $\alpha$  was monitored by pulse-chase labeling, followed by SDS-PAGE analysis of the <sup>35</sup>S-labeled proteins.

TGF $\alpha$  appears as three bands on an SDS-gel: (1) a ~15 kDa band (form I), the precursor form with its unglycosylated prodomain at the N-terminus and primarily located in the endoplasmic reticulum; (2) a ~25 kDa diffuse band (form II) with N-glycosylation of the prodomain, which occurs primarily in the Golgi; and (3) a ~10 kDa band (form III) with the prodomain proteolytically removed. Finally, ectodomain shedding of the TGF $\alpha$  forms that have or have not retained their prodomain, releases soluble TGF $\alpha$  and generates an extracellularly truncated transmembrane protein that is no longer

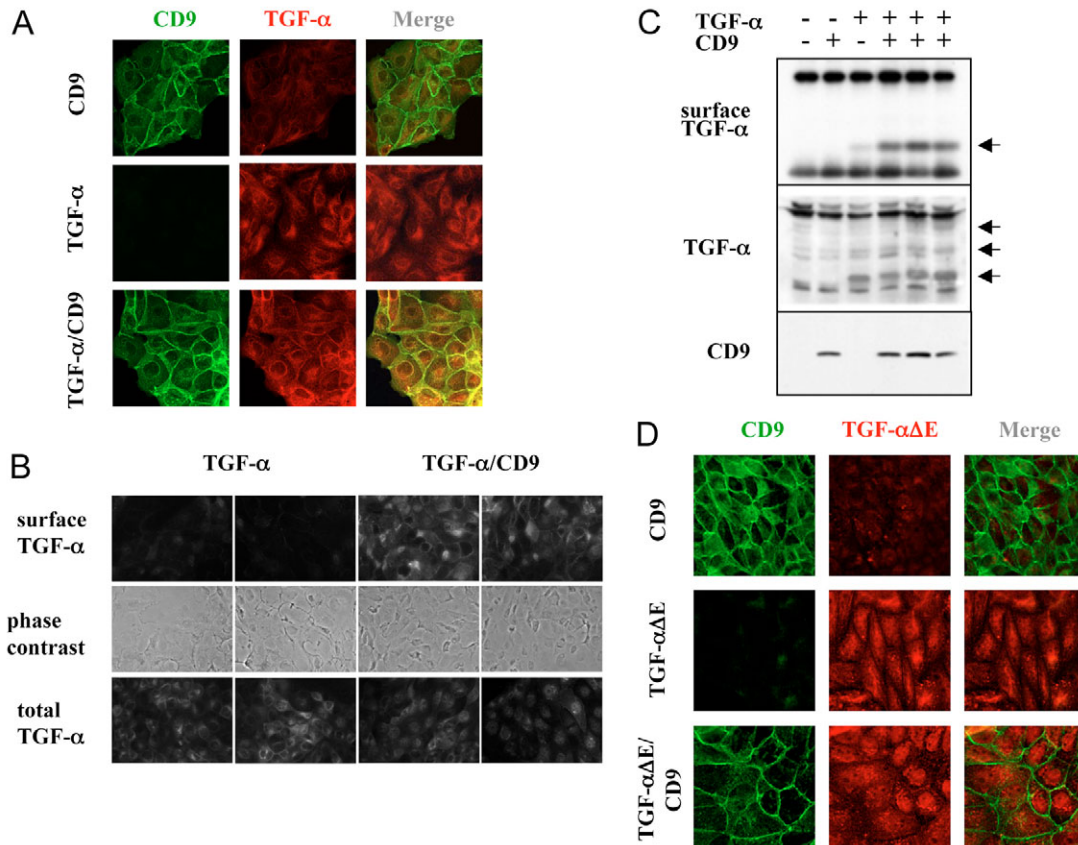

**Fig. 1.** CD9 alters the localization and presentation of TGF $\alpha$ . MDCK cells stably expressing CD9 or TGF $\alpha$ , or coexpressing CD9 and TGF $\alpha$  were analyzed. (A) Cells were fixed, permeabilized, stained and analyzed by confocal immunofluorescence microscopy (green, CD9; red, TGF $\alpha$ ). (B) Cell-surface immunostaining of TGF $\alpha$  of MDCK cells that express TGF $\alpha$ , or CD9 and TGF $\alpha$  together. Top panels show cell-surface staining of non-permeabilized cells on ice, whereas the lower panels shows total immunofluorescence for TGF $\alpha$  of permeabilized and fixed cells. The middle panels show phase-contrast microscopy of the stained cells in the top panels. (C) The cell-surface proteins labeled by biotinylation were subjected to immunoprecipitation for TGF $\alpha$ , thus showing the level of cell-surface TGF $\alpha$  in cells expressing CD9, TGF $\alpha$ , or CD9 and TGF $\alpha$  together (top panel). Middle and lower panels show immunoblotting for the expression levels of total TGF $\alpha$  and CD9, respectively. Arrows in the middle panel mark the three differentially processed TGF $\alpha$  forms (Bringman et al., 1987; Shi et al., 2000) (see also Fig. 2A). The arrow in the upper panel marks biotinylated cell-surface TGF $\alpha$ , corresponding to unglycosylated transmembrane TGF $\alpha$  without its pre-sequence (Bringman et al., 1987); this band corresponds to the lower one in the middle panel. (D) CD9 does not alter the distribution of TGF $\alpha$  that lacks the TGF $\alpha$  core sequence. MDCK cells stably expressing CD9, TGF $\alpha$ ΔE or both were fixed, permeabilized, stained and analyzed by confocal immunofluorescence microscopy (green, CD9; red, TGF $\alpha$ ΔE).

recognized by anti-TGF $\alpha$  antibodies. As shown in Fig. 2, the pulse-chase profiles of form I were similar in the presence or absence of CD9. By contrast, forms II and III showed increased stability in the presence of CD9. Thus, CD9 does not affect the expression and biosynthesis of transmembrane TGF $\alpha$  per se; rather, CD9 stabilizes the glycosylated and prodomain-removed transmembrane forms of TGF $\alpha$ .

#### CD9 redistributes TGF $\alpha$ to the apical compartment in polarized epithelial cells

Since CD9 redistributed TGF $\alpha$  from a predominantly intracellular location to the cell surface in nonpolarized cells, we also evaluated whether CD9 affects TGF $\alpha$  membrane localization in polarized cells. In MDCK cells and other epithelial cells, TGF $\alpha$  and most related TGF $\alpha$  family growth factors as well as the EGF receptor are expressed in the basolateral compartment (Brandli et al., 1991; Dempsey and Coffey, 1994), thus causing autocrine stimulation in the basolateral, but not the apical compartment, of epithelial cells (Hobert et al., 1999). By contrast, CD9 is located on both the basolateral and apical surfaces (Fig. 3) (Yanez-Mo et al., 2001).

To investigate whether CD9 influenced the polarized transport of TGF $\alpha$ , we cultured the four types of MDCK-cell derivatives on Transwell filters, thus allowing the cells to acquire and display their polarized phenotype. We examined the localization of CD9 and TGF $\alpha$  using confocal microscopy (Fig. 3A). MDCK cells expressing TGF $\alpha$  showed cell-surface expression of TGF $\alpha$  predominantly in the basolateral compartment, as reported previously (Dempsey and Coffey, 1994). Cells expressing CD9 showed apical as well as basolateral localization of CD9. The seemingly higher levels of CD9 at the apical surface may reflect the presence of microvilli, which increase the density of the apical membranes. In cells that coexpress TGF $\alpha$  and CD9, TGF $\alpha$  was redistributed from the basolateral compartment to both the apical and basolateral compartments. By contrast, CD9 expression showed a similar distribution in the presence or absence of TGF $\alpha$ . These findings indicate that CD9 can direct TGF $\alpha$  to colocalize with it, and thus to acquire the same cell-surface distribution as CD9.

To examine whether this redistribution depended on the association of TGF $\alpha$  with CD9, we examined the effect of CD9 on the cell-surface distribution of TGF $\alpha$ ΔE, which lacks the TGF $\alpha$

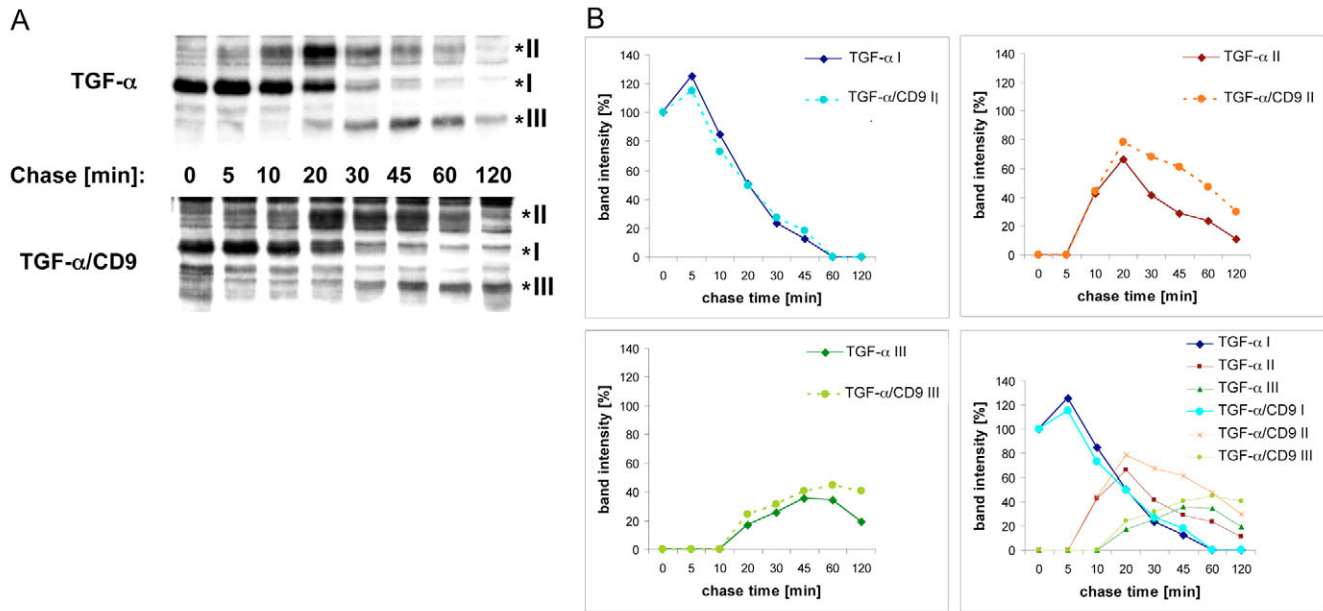

**Fig. 2.** The tetraspanin protein CD9 alters the stability of the processed forms of transmembrane TGF $\alpha$ . CHO cells expressing TGF $\alpha$  or coexpressing CD9 and TGF $\alpha$  were  $^{35}\text{S}$ -Met- $^{35}\text{S}$ -Cys pulse-labeled for 12 minutes, chased for times indicated, lysed and subjected to immunoprecipitation with anti-TGF $\alpha$  antibodies. (A) SDS-PAGE analyses of immunoprecipitated  $^{35}\text{S}$ -labeled TGF $\alpha$ . (B) Quantification of the transmembrane TGF $\alpha$  bands as a function of the chase time.

core sequence and does not associate with CD9 (Shi et al., 2000). Without the expression of CD9, TGF $\alpha$  $\Delta\text{E}$  showed a similar basolateral distribution in polarized cells as wild-type TGF $\alpha$ . This distribution of TGF $\alpha$  $\Delta\text{E}$  was not affected by concomitant expression of CD9 (Fig. 3B). Thus, whereas CD9 confers a non-polarized redistribution to wild-type TGF $\alpha$ , the inability of CD9 to associate with TGF $\alpha$  $\Delta\text{E}$  prevents such redistribution.

The redistribution of TGF $\alpha$  in the presence of CD9 was confirmed by cell-surface biotinylation of the proteins expressed at the basolateral versus apical cell surfaces (Fig. 3C). Consistent with the immunofluorescence results, TGF $\alpha$  was only detected in the basolateral compartment of MDCK cells expressing TGF $\alpha$  alone. By contrast, concomitant expression of CD9 resulted in the additional presence of TGF $\alpha$  in the apical compartment. These data also demonstrate that TGF $\alpha$  can reach higher levels at the cell surface in the presence of CD9, whereas CD9 levels are reproducibly increased in the presence of TGF $\alpha$ .

The relocation of TGF $\alpha$  by CD9 might result from a general loss of cell polarity, which could be owing to an increase in TGF $\alpha$ -induced EGFR signaling in the presence of CD9, as we previously reported. In fact, one could imagine that the increased TGF $\alpha$ /EGFR signaling may lead to the loss of polarity, a first step towards the transformed phenotype, even though the cells remained contact inhibited. To test this hypothesis, we examined the distribution of the basolateral markers E-cadherin and p58, and the apical marker gp135 (O'Brien et al., 2001), in the MDCK-derived cells. E-cadherin and p58 retained their predominantly basolateral localization, whereas gp135 was found apically in the TGF $\alpha$ -CD9 expressing MDCK cells (Fig. 3D). We therefore conclude that CD9 specifically redistributes TGF $\alpha$  to a non-polarized cell-surface localization and that CD9 expression at the same time does not affect the polarized phenotype of the cells.

Finally, we also examined the effect of CD9 expression on the expression of TGF $\alpha$  in MDCK cells embedded in growth-factor-reduced basement-membrane extract from Engelbreth-Holm-Swarm

tumor (EHS) extracellular matrix with a composition similar to that of Matrigel<sup>TM</sup>. Under these conditions, single MDCK cells grow in 4-5 days to form hollow cysts that consist of polarized cells resting on a basement membrane surrounding the cyst (O'Brien et al., 2006). Confocal examination of MDCK cells that do not ectopically express TGF $\alpha$  or CD9 showed a very low level of diffuse immunostaining of the endogenous TGF $\alpha$  throughout the cells (Fig. 4). Ectopic expression of CD9 concentrated the endogenous TGF $\alpha$  with predominant visualization at the luminal (apical) side, where the dense microvillous organization confers a high concentration of the plasma membrane (Williams and Clark, 2003). Ectopic expression of TGF $\alpha$  resulted in an increased, but diffuse TGF $\alpha$  immunostaining throughout the cells. By contrast, coexpression of CD9 and TGF $\alpha$  resulted in TGF $\alpha$  staining at the cell surface, both at the basolateral and apical surfaces. These data thus confirm that CD9 enhances the TGF $\alpha$  expression at the cell surface and does so in a non-polarized manner.

#### Increase in EGFR internalization in cells that coexpress CD9 and TGF $\alpha$

We previously showed that coexpression of CD9 results in increased EGFR activation by TGF $\alpha$  (Shi et al., 2000), related to and presumably as a consequence of the increased cell-surface expression of transmembrane TGF $\alpha$ . We therefore explored the activation of several parameters known to be regulated by EGFR signaling. One parameter that reflects the level of EGFR activation is the internalization of the EGFR, which can be assessed using confocal microscopy. In polarized cells, the ectopic expression of TGF $\alpha$  resulted in an increased level of granulated intracellular EGFR staining, a reflection of the level of EGFR internalization. The intracellular EGFR staining in TGF $\alpha$ -expressing cells was further increased when CD9 was ectopically expressed at the same time, whereas CD9 by itself had no detectable effect (Fig. 5A).

Consistent with this result, concomitant expression of CD9 enhanced the TGF $\alpha$ -induced EGFR phosphorylation (Fig. 5B) (Shi

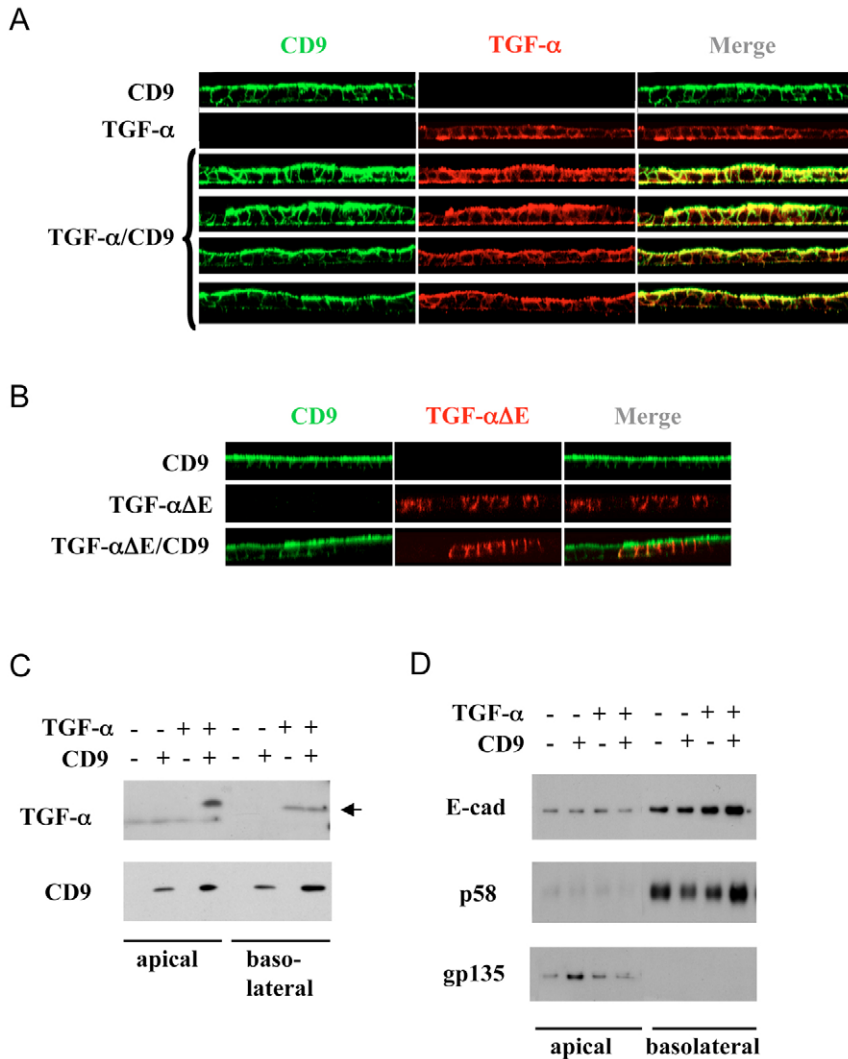

**Fig. 3.** Expression of CD9 redistributes TGF $\alpha$  to the apical site in polarized epithelial cells. MDCK cells that express CD9, TGF $\alpha$  or both proteins were grown in Transwell chambers to allow them to fully establish their polarized phenotype. (A) Cells were fixed and stained for CD9 or TGF $\alpha$ , and immunofluorescence was visualized by confocal microscopy (*xz* section). (B) Expression of CD9 does not alter the distribution of transmembrane TGF $\alpha$  that lacks the TGF $\alpha$  core sequence in polarized epithelial cells. MDCK cells stably expressing CD9, TGF $\alpha$ ΔE or both were grown in Transwell chambers to establish a polarized phenotype. Cells were fixed, stained for CD9 or TGF $\alpha$ ΔE, and immunofluorescence was visualized by confocal microscopy (*xz* section). (C) Cells were subjected to biotinylation of cell-surface proteins in the apical or basolateral compartments, and cell-surface TGF $\alpha$  and CD9 were visualized by immunoblotting. Arrow indicates the position of TGF $\alpha$  form III. (D) Same experiment as in C, but visualizing the biotinylated E-cadherin or p58, two proteins that are largely expressed in the basolateral compartment, and the apical marker gp135.

et al., 2000). Ligand-induced activation of the EGFR leads to several downstream events, including activation of MAP kinase signaling pathways. Whereas EGFR activation is known to activate Erk/MAP kinase, p38 MAP kinase and Jnk signaling, concomitant expression of CD9 did not enhance the TGF $\alpha$ -induced activation levels of these three types of MAP kinases compared with cells expressing TGF $\alpha$  alone (data not shown).

#### Effect of CD9 on the cytoskeletal organization

The MDCK cells containing control vectors or ectopically expressing CD9, TGF $\alpha$  or both all maintained their epithelial characteristics, as apparent from the expression and subcellular localization of the cell-junction proteins ZO-1, desmoglein and E-cadherin (data not shown). However, as there were some slight differences in morphology, we stained the cells for filamentous actin. Control MDCK cells and MDCK cells expressing TGF $\alpha$  or CD9 showed a similar organization and abundance of well-defined F-actin stress fibers (Fig. 6A). By contrast, cells expressing TGF $\alpha$  and CD9 showed a change in F-actin stress fiber pattern. F-actin was primarily localized at the periphery towards the surfaces of cell contacts. Since actin is linked to integrins and the extracellular matrix via focal adhesions, we examined whether this drastic change correlated with the distribution of focal adhesions. The control

MDCK cells and those ectopically expressing TGF $\alpha$  or CD9 had overall similar patterns of the focal adhesion proteins paxillin (Fig. 6A) and vinculin (data not shown). By contrast, the cells expressing CD9 and TGF $\alpha$  showed altered distribution of paxillin and vinculin that resulted in a strong reduction in the number of focal adhesions (Fig. 6A; data not shown). Treatment of MDCK cells with soluble TGF $\alpha$  or EGF at saturating levels (5 ng/ml) for short and long periods, did not result in the actin organization and focal adhesion distribution observed in MDCK cells that expressed CD9 and TGF $\alpha$ . However, exposure of the cells to 100 ng/ml TGF $\alpha$  for 24 hours resulted in a reduction of actin and paxillin staining that appeared intermediate between the phenotype of cells that expressed CD9 and TGF $\alpha$ , and those that only expressed TGF $\alpha$  (data not shown).

#### Coexpression of CD9 and TGF $\alpha$ results in alterations in the GTPase activity of Rho family members

Actin stress fibers and focal adhesions are regulated by Rho-family GTPases. Among these, RhoA, Rac1 and Cdc42 regulate cell shape through their effects on cytoskeletal organization. RhoA is a key regulator of the formation of actin stress fibers and focal adhesions, whereas Rac1 is associated with the assembly of actin filaments during lamellipodia formation and is generally activated in a reciprocal fashion to RhoA (Burridge and Doughman, 2006). Cdc42 has an important role in the cell polarization (Etienne-Manneville, 2004). We thus explored whether these small GTPases are involved in the changes in actin stress fibers and focal adhesion distribution in the cells expressing CD9 and TGF $\alpha$ . We quantified the levels of activated, GTP-bound forms of RhoA, Rac1 and Cdc42 (Fig. 6B). Control cells and cells expressing CD9 or TGF $\alpha$  all had similar levels of active RhoA, Rac1 and Cdc42. However, in cells that coexpress CD9 and TGF $\alpha$ , the level of GTP-bound RhoA was decreased, whereas the GTP-bound Rac1 level was slightly increased. The active form of Cdc42 showed no significant difference between the cell lines.

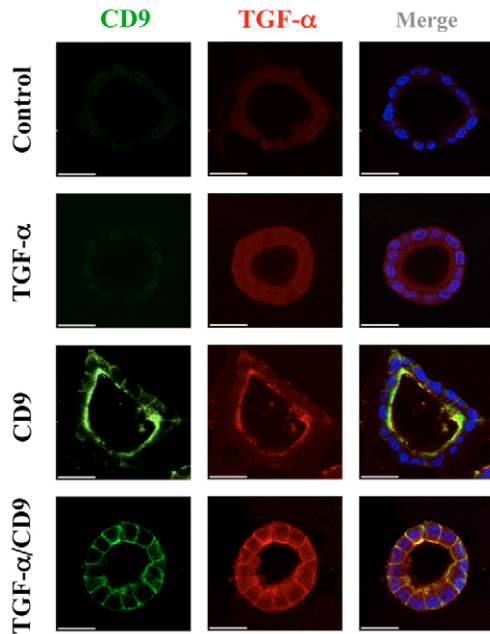

**Fig. 4.** Effect of CD9 on TGF $\alpha$  cell-surface expression in 3D cell cultures. MDCK cells expressing CD9, TGF $\alpha$  or both proteins were embedded in Engelbreth-Holm-Swarm (EHS) tumor basement membrane extract and grown until cysts had formed. The cells were fixed and stained for CD9 or TGF $\alpha$ , and immunofluorescence images were captured using confocal microscopy. Scale bars: 20  $\mu$ m.

Changes in cytoskeletal organization and GTPase activity are inhibited by blocking EGFR signaling

Since coexpression of CD9 and TGF $\alpha$  strongly enhances EGFR activation, we evaluated whether the changes in the distribution of actin stress fibers and focal adhesion were related to the EGFR activation. Addition of an antibody that prevents ligand binding to the EGFR ectodomain, reversed the changes in actin stress fiber organization to a phenotype that is similar to that seen in the control MDCK cells (Fig. 6A, right column). Likewise, treatment of the cells that expressed TGF $\alpha$  and CD9 with the anti-EGFR antibody resulted in a change of the distribution of focal adhesion sites back to that observed in control cells or cells expressing CD9 or TGF $\alpha$  only, as visualized by immunofluorescence for paxillin (Fig. 6A, right column) or vinculin (data not shown). In addition, blocking EGFR activation using AG1478 rescued the change in activity of RhoA and Rac1 to the level that was observed in control MDCK cells or cells expressing CD9 or TGF $\alpha$  only (Fig. 6C). Finally, the role of EGFR activation in the phenotypic changes conferred by CD9 and TGF $\alpha$  coexpression was also evaluated in MDCK cells coexpressing CD9 and TGF $\alpha\Delta$ E, the TGF $\alpha$  derivative that lacks the TGF $\alpha$  core sequence required for EGFR activation. As shown in Fig. 6D, cells coexpressing CD9 and TGF $\alpha\Delta$ E showed multiple focal adhesions and an actin stress fiber organization that was unlike the changes seen in cells coexpressing CD9 and TGF $\alpha$ , but similar to the pattern obtained when these cells were incubated in the presence of the EGFR antibody (Fig. 6A).

Expression of CD9 in the presence of TGF $\alpha$  results in changes in cell migration and adhesion

Since coexpression of CD9 and TGF $\alpha$  led to a dramatic reduction in actin stress fibers accompanied with a change in the activation state of RhoA and Rac1, we investigated the migration and adhesion properties of the stable cells expressing CD9, TGF $\alpha$  or both. Cells

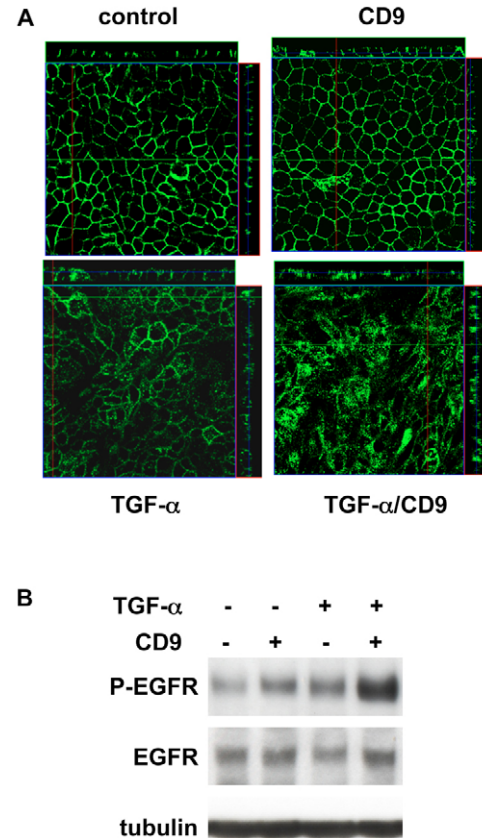

**Fig. 5.** (A) Increase in EGFR internalization in MDCK cells expressing CD9, TGF $\alpha$  or CD9 and TGF $\alpha$ . Cells were cultured in Transwell chambers, thus allowing full polarization, fixed and immunostained for EGFR. Immunofluorescence was visualized using confocal microscopy (*xy* section). (B) Cells were grown in regular culture medium, lysed, immunoprecipitated with anti-EGFR antibody and immunoblotted with antibodies against EGFR phosphorylated at tyrosine, EGFR or tubulin to detect phosphorylated EGFR (P-EGFR), total EGFR or tubulin.

were examined in a modified Boyden chamber assay in which they migrated through a Transwell filter from 0% to 10% serum. Coexpression of CD9 and TGF $\alpha$  strongly decreased cell migration, whereas cells expressing only CD9 showed a much smaller decrease of migration, and expression of TGF $\alpha$  alone did not affect the migration of the cells (Fig. 7A). Thus, the expression of the tetraspanin CD9 in cells that express TGF $\alpha$  drastically affects the activation of small GTPases, the organization of actin stress fibers, focal adhesions and cell migration.

To investigate cell adhesion, we seeded the cells onto cell culture dishes that had been coated with fibronectin, removed the non-adherent cells after 20 or 40 minutes, and quantified the adherent cells. At 20 minutes after cell seeding, there was only a slight difference in the adhesion between the cell lines. However, 40 minutes after seeding, there was a significant difference in cell adhesion with an increase in adhesion within cells that expressed both CD9 and TGF $\alpha$  (Fig. 7B). This result is consistent with the decrease in cell migration of these cells in the Boyden chamber assays.

## Discussion

The TGF $\alpha$  family of growth factors, such as TGF $\alpha$ , HB-EGF and amphiregulin, comprises transmembrane proteins that undergo a regulated cleavage in order to release soluble growth factor. The

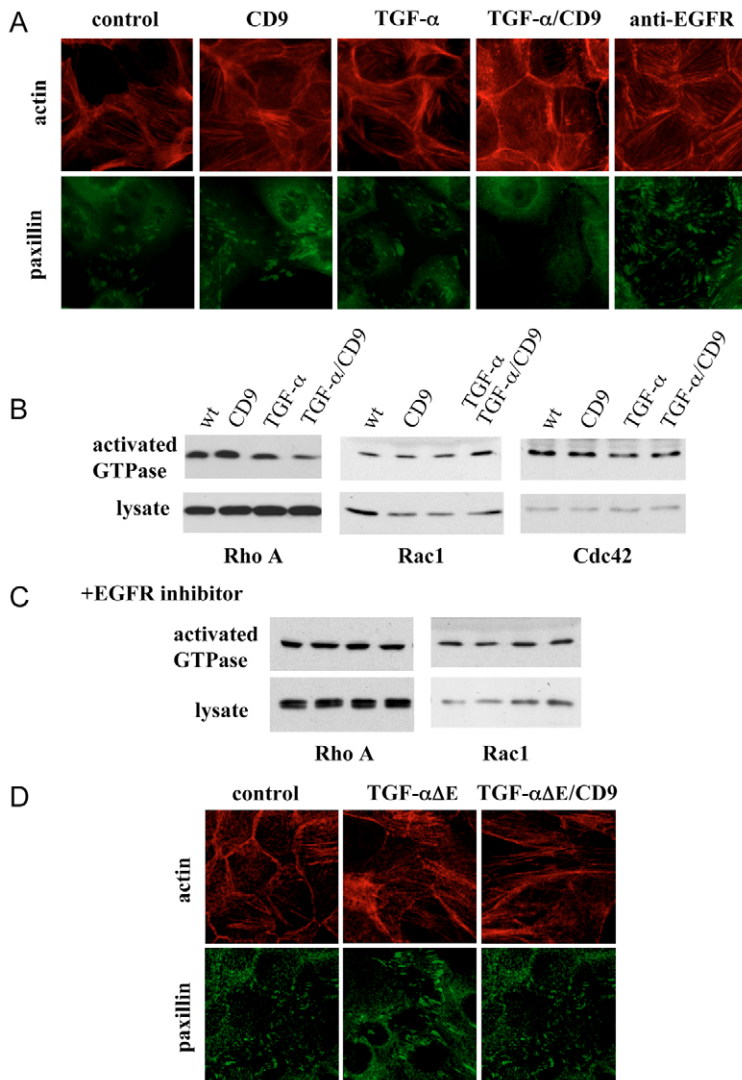

**Fig. 6.** Coexpression of CD9 and TGF $\alpha$  confers changes in actin stress fibers and activities of Rho family of small GTPases that can be rescued by blocking the EGFR activation. (A) MDCK cells expressing CD9, TGF $\alpha$  or CD9 and TGF $\alpha$  were stained with Alexa-Fluor-594-phalloidin (red) or by immunofluorescence for paxillin (green), and analyzed by confocal microscopy. The last two images (top and bottom) show MDCK cells expressing CD9 and TGF $\alpha$  in the presence of a blocking EGFR antibody. (B) The same cells as shown in A were evaluated for the level of activated, GTP-bound forms of the small GTPases RhoA, Cdc42 or Rac1. (C) RhoA and Rac1 GTPases activities were analyzed in the presence of the EGFR inhibitor AG1478. (D) CD9 expression does not change the distribution of actin stress fibers or focal adhesions when expressed with transmembrane TGF $\alpha$  that lacks the TGF $\alpha$  core domain. MDCK cells that express TGF $\alpha$  $\Delta$ E, or TGF $\alpha$  $\Delta$ E and CD9 together were stained using phalloidin (red) or paxillin (green) and analyzed by confocal immunofluorescence microscopy.

transmembrane and soluble growth factors both activate the EGFR, but their modes of signaling differ. The transmembrane forms stimulate EGFRs on adjacent cells or on the growth-factor-producing cells themselves, whereas release of soluble growth factor allows EGFR activation of cells at a distance (Brachmann et al., 1989; Ebner and Derynck, 1991; Wong et al., 1989). Furthermore, EGFR activation by soluble TGF $\alpha$  probably differs from activation by transmembrane TGF $\alpha$  because of differences in internalization of the ligand-bound EGFR. Defects in TGF $\alpha$  ectodomain cleavage

have been shown to confer increased EGFR signaling by transmembrane TGF $\alpha$  as well as slower EGFR internalization when compared with soluble ligand (Yang et al., 2000). These results suggest that defective TGF $\alpha$  processing confers increased EGFR signaling, compared with cells showing TGF $\alpha$  ectodomain shedding. In addition, membrane-bound HB-EGF has been shown to be less effective in activating the EGFR but to prolong the EGFR half-life (Miyoshi et al., 1997). Thus, the presentation of a growth factor of the TGF $\alpha$  family as a transmembrane versus soluble polypeptide confers differences in EGFR activation and cell responses.

#### CD9 enhances TGF $\alpha$ presentation at the cell surface and redistributes TGF $\alpha$ in polarized cells

We provide evidence that CD9, which interacts with transmembrane TGF $\alpha$  (Shi et al., 2000), plays an important role in the presentation of TGF $\alpha$ . CD9 stabilized the transmembrane forms of TGF $\alpha$  in the Golgi and at the cell surface, but not the immature TGF $\alpha$  precursor, which is located in the endoplasmic reticulum. These effects are consistent with the predominant localization of CD9 at the cell surface and may be explained in part by the decreased TGF $\alpha$  ectodomain shedding in the presence of CD9 (Shi et al., 2000). The increased stability of transmembrane TGF $\alpha$  may explain the increase of cell-surface TGF $\alpha$  level in the presence of CD9 (Fig. 1).

Our data also indicate that CD9 defines the distribution of TGF $\alpha$  in polarized cells. In polarized cells, CD9 is expressed in a non-polarized manner at the cell surface, and TGF $\alpha$  is expressed at basolateral surfaces where the EGFR is predominantly localized (Brandli et al., 1991). In the presence of CD9, however, TGF $\alpha$  is distributed at both the apical and basolateral compartments. Since the apical membranes organize themselves as microvilli with a high density of membranes, and tumor necrosis factor  $\alpha$  (TNF $\alpha$ )-converting enzyme (TACE) cleaves TGF $\alpha$  at the basolateral membrane (Dempsey and Coffey, 1994), TGF $\alpha$  is predominantly expressed at the apical surface when CD9 is present. This non-polarized redistribution of TGF $\alpha$  by CD9 is not owing to depolarization of the epithelial cells, but reflects an important role of CD9 in the stabilization of TGF $\alpha$  at the cell surface, as well as its cell-surface distribution (Fig. 3).

The effects of CD9 on the cell-surface presentation of TGF $\alpha$  were also apparent in three-dimensional (3D) cultures, in which MDCK cells form spherical structures with an internal lumen that abuts the apical cell surfaces. In such cultures, endogenous TGF $\alpha$  showed a diffuse cellular staining, but concomitant expression of CD9 conferred a striking presence of TGF $\alpha$  at the cell surface, primarily at the apical, luminal membrane with its microvillous organization. The effect of CD9 in stabilizing TGF $\alpha$  and providing a non-polarized distribution of TGF $\alpha$  at the plasma membrane was also apparent in cells that ectopically coexpress both CD9 and TGF $\alpha$  (Fig. 4).

The enhanced cell-surface presentation of TGF $\alpha$  and its redistribution in polarized cells in the presence of CD9 depend on the six-cysteine core sequence of transmembrane TGF $\alpha$ . Since this sequence is required for the interaction of transmembrane TGF $\alpha$  with CD9 (Shi et al., 2000), we conclude that these effects of CD9 on TGF $\alpha$  presentation depend on their physical association. Since CD9



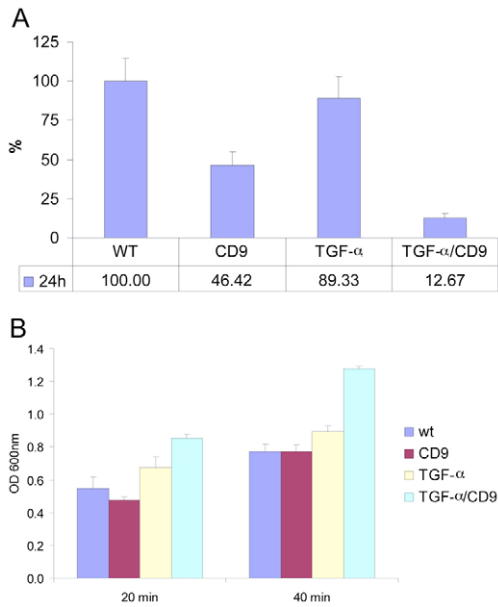

**Fig. 7.** Coexpression of CD9 and TGF $\alpha$  alters cell migration and adhesion. (A) Migration of MDCK cells expressing CD9, TGF $\alpha$  or both was analyzed in a Boyden chamber assay. Cell migration towards medium with 10% serum was quantified after 24 hours by counting those cells that had migrated through the membrane. Numbers of migrating cells were plotted in percent; 100% migration was defined as the number of migrated wild-type cells. (B) Cell adhesion was examined by Crystal Violet staining of the adherent cells after 20 or 40 minutes after seeding onto fibronectin-coated wells.

also interacts with the TGF $\alpha$ -related HB-EGF and amphiregulin (Inui et al., 1997), we surmise that CD9 also enhances their presentation at the cell surface. Since this core sequence is required for the interaction of CD9 with transmembrane TGF $\alpha$  and because it defines proteins of the TGF $\alpha$  family, CD9 might increase the cell-surface presentation and stability of all TGF $\alpha$  family proteins. The increased availability of TGF $\alpha$  or TGF $\alpha$ -related proteins at the cell surface is expected to greatly enhance juxtacrine activation of the EGFR – as previously shown (Shi et al., 2000).

In polarized cells, TGF $\alpha$  and amphiregulin are normally localized basolaterally, where also the EGFR is predominantly localized, resulting in extensive ligand-induced internalization. Low EGFR levels are also found at the apical surface (Hobert et al., 1999). The redistribution of TGF $\alpha$  at the surface of polarized cells in the presence of CD9 might affect where in the cell EGFR populations are activated. CD9 expression in TGF $\alpha$ -expressing cells enhanced EGFR activation and internalization in polarized cells (Fig. 5), implying that the apical ligand is capable of activating the EGFR. It will be interesting to evaluate whether apical versus basolateral activation of the EGFR results in differences in routing of ligand-receptor complexes and functional consequences.

The roles of tetraspanins in protein transport and maturation have only been studied in a few cases. The tetraspanin CD81 facilitates the processing and transport of the glycoprotein CD19, starting with its requirement for exit from the endoplasmic reticulum to the processing and glycosylation of CD19 (Shoham et al., 2006). The tetraspanins uroplakin Ia and uroplakin Ib allow transit of the non-tetraspanin uroplakins UPII and UPIII from the Golgi to the cell surface to form urothelial plaques (Tu et al., 2006). We now provide evidence for a role of CD9 in processing and cell-surface presentation of TGF $\alpha$ , suggesting similar effects on all TGF $\alpha$ -family proteins.

Little is known about how the presentation of TGF $\alpha$ -family proteins is controlled. Cornichon, which transverse the membrane three times, regulates transport of TGF $\alpha$  family proteins in *Drosophila* and mammalian cells (Bokel et al., 2006; Perez-Castro et al., 2007), whereas Rhomboid proteins regulate cleavage of the TGF $\alpha$ -related Spitz and Gurken in *Drosophila* (Urban, 2006). In addition, the cytoplasmic PDZ-domain proteins GRASP55 and syntenin interact with the C-terminal sequence of transmembrane TGF $\alpha$  and control the transport of TGF $\alpha$  to the cell surface (Fernandez-Larrea et al., 1999; Kuo et al., 2000). We now provide evidence that the tetraspanin CD9 regulates both the maturation and stability of TGF $\alpha$  at the cell surface.

#### Coexpression of CD9 and TGF $\alpha$ alters the epithelial phenotype and the cell behavior

Epithelial cells that coexpress CD9 and TGF $\alpha$  showed distinct phenotypic changes compared with wild-type cells or cells that ectopically expressed CD9 or TGF $\alpha$ . All cells had an epithelial phenotype, independently of whether they expressed TGF $\alpha$ , CD9 or both, as assessed by morphology in monolayer culture and polarized phenotype, and expressed epithelial junction markers such as ZO-1, E-cadherin and desmoglein (data not shown). However, cells that expressed TGF $\alpha$  and CD9 had a striking cortical organization of actin stress fibers, and a much lower number of focal adhesions, as assessed by immunofluorescence for paxillin or vinculin. This phenotype was not apparent in cells expressing only CD9 or TGF $\alpha$ , and was not mimicked by adding soluble TGF $\alpha$  at saturating concentrations (Fig. 6; data not shown). However, when cells that ectopically express TGF $\alpha$  were treated with the metalloprotease inhibitors TAPI-1 or GM6001 (which block TACE-mediated TGF $\alpha$  ectodomain shedding), we observed changes similar to those seen in cells that coexpress CD9 and TGF $\alpha$  (data not shown). These data indicate that coexpression of CD9 and TGF $\alpha$  triggers responses that are not exerted by either protein alone, and that responses to transmembrane TGF $\alpha$  differ from the responses to soluble ligand.

The changes in actin-stress-fiber organization and the decreased number in focal adhesions were accompanied by a decrease in RhoA activation and an increase in Rac1 activation. RhoA regulates the formation of actin stress fibers and focal adhesions, whereas Rac1 activation correlates with actin filament assembly during lamellipodia formation and is generally reciprocal to RhoA activation (Burrige and Doughman, 2006). Interfering with RhoA function perturbs actin stress fibers and focal adhesions, whereas overexpression of RhoA induces the assembly of actin stress fibers (Aspenstrom et al., 2004; Evers et al., 2000). RhoA can also be activated by GPCR ligands, which results in cytoskeletal reorganization (Brown et al., 2006). Considering the functions of RhoA and Rac1, the changes in actin organization and focal adhesion in TGF $\alpha$ -CD9-expressing cells are likely to result from the altered activation of these small GTPases.

The changes in actin organization and in the number of focal adhesions of TGF $\alpha$ -CD9-expressing MDCK cells required EGFR activation. Indeed, these changes were reverted to the organization seen in wild-type cells by a neutralizing anti-EGFR antibody and were not seen in cells coexpressing CD9 and TGF $\alpha$  $\Delta$ E, which lacks the TGF $\alpha$  core sequence that activates the EGFR. Furthermore, blocking the EGFR activation also inhibited the decreased RhoA and increased Rac1 activity. These results directly link the changes in phenotype and small GTPase activation to EGFR activation, and functionally link the RhoA and Rac1 activation states with the changes in actin organization and focal adhesions. On the basis of

these findings, the observation that inhibition of TGF $\alpha$  shedding in TGF $\alpha$ -expressing MDCK cells confers similar changes in actin and focal adhesion compared with those in CD9-TGF $\alpha$ -expressing cells, and our previous report (Shi et al., 2000), we conclude that coexpression of CD9 and TGF $\alpha$  results in EGFR hyperactivation by transmembrane TGF $\alpha$  to a level that can not be mimicked by soluble ligand, and results in changes in small GTPase activity with consequent phenotypic changes.

Since small GTPases, focal adhesions and actin organization have important roles in cell adhesion and migration, we evaluated the adhesion and migration behavior of TGF $\alpha$ -CD9-expressing cells. These cells showed a decreased cell migration and increased cell adhesion in comparison with MDCK cells that expressed either TGF $\alpha$  or CD9 alone, or with wild-type cells. TGF $\alpha$  signaling through the EGFR is known to have an important role in carcinoma development and progression and, accordingly, the expression of the EGFR or TGF $\alpha$ , or both, is often upregulated in carcinomas (Holbro et al., 2003; Kenny and Bissell, 2007; Lee et al., 1995). However, increased CD9 levels in carcinomas have been correlated with decreased metastatic potential (Boucheix et al., 2001). Our observation of increased adhesion and decreased migration observed in cells that coexpress TGF $\alpha$  and CD9 is consistent with these studies.

In summary, we have shown that CD9 profoundly affects the maturation, cell-surface presentation and cell-surface distribution of transmembrane TGF $\alpha$ . Expression of CD9 results in phenotypic and behavioral changes in epithelial cells that express TGF $\alpha$ , which are mediated by EGFR activation to an extent that can not be mimicked by soluble ligand. Since increased TGF $\alpha$  signaling through the EGFR is a major force in carcinoma progression and because CD9 expression correlates with decreased metastasis, our results may be of relevance for the role of CD9 in carcinoma progression and behavior. Furthermore, because CD9 also interacts with other proteins of the TGF $\alpha$  family, our results might reflect roles of CD9 in the biology of this growth factor family.

## Materials and Methods

### Antibodies

Mouse monoclonal anti-CD9, anti-E-cadherin, anti-Rac1 and anti-Cdc42 antibodies were from BD Biosciences. Mouse anti-TGF $\alpha$  Ab-1 for western blotting was from Oncogene Research, mouse monoclonal anti-TGF $\alpha$   $\alpha$ 1 antibody for surface staining has been described before (Bringman et al., 1987), goat anti-human TGF $\alpha$  antibody for immunoprecipitation was from R&D Systems, and sheep anti-human TGF $\alpha$  antibody for immunofluorescence was a gift from R. J. Coffey (Vanderbilt University, Nashville, TN). Mouse anti-p58 antibody was a gift from Karl Matlin and mouse anti-gp135 antibody was a gift from George Ojakian, rabbit anti-EGFR (1005) and rabbit anti-RhoA antibodies were from Santa Cruz Biotechnology, Inc. Mouse anti-paxillin antibody was from Zymed. Rabbit anti-Myc epitope antibody to detect TGF $\alpha$  $\Delta$ E was from Sigma.

### Construction of expression plasmids

To express CD9 or TGF $\alpha$ , we subcloned cDNAs encoding human CD9 or TGF $\alpha$  into retroviral expression plasmids. The sequence of CD9 8 bp upstream to 58 bp downstream of the coding sequence was amplified by PCR from pRK7-CD9-hygro (Shi et al., 2000) with primers 5'-GTCCAAGAGTTAACCCTCACCATGCCGGTCAAAGG-3' and 3'-GTCCATGAGTTAACCAAGCTGCAATAAACAAAGTTGGGC-5', thereby introducing *Hpa*I sites, and subcloned into the *Hpa*I site of pLHCX (Clontech). For TGF $\alpha$ , the sequence between -6 bp and +28 bp relative to the coding sequence was amplified by PCR from pRK7-TGF $\alpha$  (Shum et al., 1994) with primers 5'-GTGCTAGAGTTAACGTAATAATGGTCCCCTCGGCTGG-3' and 3'-CGCTA-TCTGTAAACACCTGGCCAACTCCTCTCTG-5' to introduce *Hpa*I sites, and subcloned into the *Hpa*I site of pLPCX (Choy et al., 2000). The TGF $\alpha$  $\Delta$ E sequence, which encodes full size TGF $\alpha$ , in which the 50-amino acid TGF $\alpha$  core sequence has been replaced by a Myc epitope tag (Shi et al., 2000), was transferred as an *Eco*RI-*Hind*III fragment from pRK7-TGF $\alpha$  $\Delta$ E into pLPCX.

### Cell culture

MDCK cells were obtained from K. Mostov (University of California, San Francisco, CA) and cultured in minimal essential medium (MEM) containing Earle's balanced salt solution supplemented with 5% fetal bovine serum and antibiotics in an

atmosphere of 5% CO<sub>2</sub>, 95% air. CHO cells were cultured as described previously (Shi et al., 2000).

### Generation of stable cell lines

MDCK cells were infected with the pLPCX-derived vector encoding TGF $\alpha$ , TGF $\alpha$  $\Delta$ E or control vector, and/or a pLHCX based vector encoding CD9 or control vector. Cells were selected in 0.5  $\mu$ g/ml hygromycin (pLHCX infections) or 2  $\mu$ g/ml puromycin (pLPCX infections) for 1-2 weeks. Expression levels of CD9, TGF $\alpha$  and TGF $\alpha$  $\Delta$ E were verified using western blotting. Cells were maintained in the presence of hygromycin and puromycin.

### Metabolic labeling, cell lysis, immunoprecipitation, immunoblot analysis and cell-surface biotinylation

Metabolic labeling and immunoprecipitation were performed as described before (Lee et al., 2003) with the following modifications. Stable CHO cells that expressed TGF $\alpha$ , CD9, or TGF $\alpha$  and CD9 (Shi et al., 2000), were labeled for 12 minutes in Ham's F12 medium without cysteine and methionine, washed and incubated in Ham's F12 medium with 10% fetal bovine serum. Cells were washed five times in PBS and lysed in lysis buffer (137 mM NaCl, 1% Triton X-100, 20 mM Tris, pH 8.0, 2 mM EDTA), supplemented with complete protease inhibitor cocktail (Roche). TGF $\alpha$  immunoprecipitation and western blotting was visualized by Phosphorimager. Immunoprecipitation and immunoblot analyses were carried out as described before (Shi et al., 2000). Cell-surface biotinylation was performed as described (Kuo et al., 2000; Lipschutz et al., 2001). Cell-surface proteins were pulled down by Neutravidin agarose (Pierce), run on SDS-PAGE, and analyzed by western blotting.

### Culture of MDCK cells on Transwell filters and biotinylation of cell-surface proteins

MDCK cells were cultured to acquire their polarized phenotype, and apical and basolateral cell-surface protein were biotinylated as described before (Lipschutz et al., 2001) with minor modifications. Briefly, MDCK cells were grown on Transwell filters for 4-7 days, two wells for each cell type and washed three times with ice cold PBS. Sulfo-NHS-biotin was added either apically or basolaterally to the cells, which were then incubated for 30 minutes at 4°C on ice on a rocking table. Cells were washed five times with 10 mM ice-cold TBS. Transwell filter were removed, proteins solubilized with lysis buffer, and apical or basolateral proteins analyzed as described (Lipschutz et al., 2001).

### Immunofluorescence and confocal microscopy

Cells were grown on coverslips and, in case of EGFR inhibition, incubated for 4-16 hours with 5  $\mu$ g/ml anti-EGFR antibody ab-1 (Calbiochem). Immunofluorescence staining was performed as described (Shi et al., 2000) with the following modifications. Cells were fixed with 4% paraformaldehyde (PFA) for 10 minutes, secondary antibodies and phalloidin were from the Alexa Fluor series (Molecular Probes). Cells were mounted with Cytoseal 60 (Richard-Allen Scientific) or Prolong Gold antifade reagent (Molecular Probes). For cell-surface staining, cells grown on coverslips were cooled on ice for 15 minutes, and incubated with anti-TGF $\alpha$  antibody on ice for 30-60 minutes. Cells were washed with ice-cold PBS and fixed for 20 minutes with 4% PFA on ice. After blocking, cells were incubated with secondary antibody. For polarized cell immunofluorescence, cells were incubated and stained as described before (Lipschutz et al., 2001), and immunofluorescence was examined using a Zeiss LSM510 confocal microscope.

### 3D-cell cultures

3D-cultures were prepared by trypsinizing confluent MDCK cells and then embedding single cells ( $1.6 \times 10^5$  cells/ml) in growth-factor-reduced Engelbreth-Holm-Swarm tumor extract (Cultrex<sup>TM</sup>, Trevigen Inc., Gaithersburg, MD) (Weaver et al., 1997). Cultures were fed every 2 days. Immunostaining was performed as described by (Weaver et al., 1997). Briefly, the cultures were fixed with 2% PFA, embedded in sucrose and frozen in Tissue-Tek O.C.T. (Sakura Finetek, Torrance CA). Immunostaining was performed on sequential 20- $\mu$ m sections using primary antibodies and Alexa-Fluor-conjugated secondary antibodies. Nuclei were visualized with diaminophenylindole (DAPI, Sigma). Confocal imaging was performed on a Zeiss LSM510 laser scanning confocal microscopy system with LSM 510 software.

### Small GTPase activation assay

MDCK cells were grown to 70-80% confluency, starved for 4 hours before adding 20% serum or EGFR inhibitor AG1478 at 1  $\mu$ M/ml or 5  $\mu$ g/ml anti-EGFR antibody Ab-1 for 2 hours. Cdc42 and Rac1 GTPase activation were detected as described before (Benard and Bokoch, 2002). RhoA activation was performed following the manufacturer's protocol (Cytoskeleton, Inc.).

### Cell adhesion and migration

Cell adhesion assays were performed using 12-well culture dishes that had been coated with 10  $\mu$ g/ml fibronectin. Cells were starved for 24 hours, trypsinized, washed with PBS and resuspended in serum-free medium. 50,000 cells were added per well, and non-adherent cells were removed after the times indicated. The plates were gently rinsed with PBS and fixed with 4% paraformaldehyde. For quantification cells were

stained with 0.1% Crystal Violet in PBS for 5 minutes, washed with water and dried. 10% acetic acid was added and the absorption of the solution was measured at 595 nm. Each experiment was performed at least three times in triplicates.

Cell migration assays were carried out as described before (Leavesley et al., 1992; Sieg et al., 1998). Serum-starved cells were added to the upper chamber (100,000 cells in 100  $\mu$ l) in serum-free medium, whereas the lower chamber contained medium with 10% fetal bovine serum. Migration was measured after 24 hours by staining the cell nuclei with DAPI.

This work was supported by NIH Grant R01 CA54826, a Swiss Science Foundation Postdoctoral Fellowship and a research training fellowship from the American Lung Association of California to I.I. and a training grant from the National Institutes of Health (5T32 DK07573-19) to W.J.G. We thank R. Coffey Jr (Vanderbilt University Medical Center, Nashville, TN) for anti-TGF $\alpha$  antiserum.

## References

- Ariztia, E. V., Lee, C. J., Gogoi, R. and Fishman, D. A. (2006). The tumor microenvironment: key to early detection. *Crit. Rev. Clin. Lab. Sci.* **43**, 393-425.
- Arribas, J. and Borroto, A. (2002). Protein ectodomain shedding. *Chem. Rev.* **102**, 4627-4638.
- Aspenstrom, P., Fransson, A. and Saras, J. (2004). Rho GTPases have diverse effects on the organization of the actin filament system. *Biochem. J.* **377**, 327-337.
- Benard, V. and Bokoch, G. M. (2002). Assay of Cdc42, Rac, and Rho GTPase activation by affinity methods. *Meth. Enzymol.* **345**, 349-359.
- Bokel, C., Dass, S., Wilsch-Brauninger, M. and Roth, S. (2006). Drosophila Cornichon acts as cargo receptor for ER export of the TGF $\alpha$ -like growth factor Gurken. *Development* **133**, 459-470.
- Boucheix, C., Duc, G. H., Jamin, C. and Rubinstein, E. (2001). Tetraspanins and malignancy. *Expert Rev. Mol. Med.* **2001**, 1-17.
- Brachmann, R., Lindquist, P. B., Nagashima, M., Kohr, W., Lipari, T., Napier, M. and Derynck, R. (1989). Transmembrane TGF- $\alpha$  precursors activate EGF/TGF- $\alpha$  receptors. *Cell* **56**, 691-700.
- Brandli, A. W., Adamson, E. D. and Simons, K. (1991). Transcytosis of epidermal growth factor. The epidermal growth factor receptor mediates uptake but not transcytosis. *J. Biol. Chem.* **266**, 8560-8566.
- Bringman, T. S., Lindquist, P. B. and Derynck, R. (1987). Different transforming growth factor- $\alpha$  species are derived from a glycosylated and palmitoylated transmembrane precursor. *Cell* **48**, 429-440.
- Brown, J. H., Del Re, D. P. and Sussman, M. A. (2006). The Rac and Rho hall of fame: a decade of hypertrophic signaling hits. *Circ. Res.* **98**, 730-742.
- Burridge, K. and Doughman, R. (2006). Front and back by Rho and Rac. *Nat. Cell Biol.* **8**, 781-782.
- Cheifetz, S., Bellon, T., Cales, C., Vera, S., Bernabeu, C., Massague, J. and Letarte, M. (1992). Endoglin is a component of the transforming growth factor- $\beta$  receptor system in human endothelial cells. *J. Biol. Chem.* **267**, 19027-19030.
- Choy, L., Skillington, J. P. and Derynck, R. (2000). Roles of autocrine TGF- $\beta$  receptor and Smad signaling in adipocyte differentiation. *J. Cell Biol.* **149**, 667-682.
- Dancey, J. E. and Freidlin, B. (2003). Targeting epidermal growth factor receptor-are we missing the mark? *Lancet* **362**, 62-64.
- Dempsey, P. J. and Coffey, R. J. (1994). Basolateral targeting and efficient consumption of transforming growth factor- $\alpha$  when expressed in Madin-Darby canine kidney cells. *J. Biol. Chem.* **269**, 16878-16889.
- Ebner, R. and Derynck, R. (1991). Epidermal growth factor and transforming growth factor- $\alpha$ : differential intracellular routing and processing of ligand-receptor complexes. *Cell Regul.* **2**, 599-612.
- Esparza-Lopez, J., Montiel, J. L., Vilchis-Landeros, M. M., Okadome, T., Miyazono, K. and Lopez-Casillas, F. (2001). Ligand binding and functional properties of betaglycan, a co-receptor of the transforming growth factor- $\beta$  superfamily. Specialized binding regions for transforming growth factor- $\beta$  and inhibin A. *J. Biol. Chem.* **276**, 14588-14596.
- Etienne-Manneville, S. (2004). Cdc42-the centre of polarity. *J. Cell Sci.* **117**, 1291-1300.
- Evers, E. E., Zondag, G. C., Malliri, A., Price, L. S., ten Klooster, J. P., van der Kammen, R. A. and Collard, J. G. (2000). Rho family proteins in cell adhesion and cell migration. *Eur. J. Cancer* **36**, 1269-1274.
- Fan, H. and Derynck, R. (1999). Ectodomain shedding of TGF- $\alpha$  and other transmembrane proteins is induced by receptor tyrosine kinase activation and MAP kinase signaling cascades. *EMBO J.* **18**, 6962-6972.
- Fernandez-Larrea, J., Merlos-Suarez, A., Urena, J. M., Baselga, J. and Arribas, J. (1999). A role for a PDZ protein in the early secretory pathway for the targeting of proTGF- $\alpha$  to the cell surface. *Mol. Cell* **3**, 423-433.
- Garcia-Lopez, M. A., Barreiro, O., Garcia-Diez, A., Sanchez-Madrid, F. and Penas, P. F. (2005). Role of tetraspanins CD9 and CD151 in primary melanocyte motility. *J. Invest. Dermatol.* **125**, 1001-1009.
- Guerrini, M., Hricovini, M. and Torri, G. (2007). Interaction of heparins with fibroblast growth factors: conformational aspects. *Curr. Pharm. Des.* **13**, 2045-2056.
- Hemler, M. E. (2005). Tetraspanin functions and associated microdomains. *Nat. Rev. Mol. Cell Biol.* **6**, 801-811.
- Hobert, M. E., Friend, L. A. and Carlin, C. R. (1999). Regulation of EGF signaling by cell polarity in MDCK kidney epithelial cells. *J. Cell. Physiol.* **181**, 330-341.
- Holbro, T., Civenni, G. and Hynes, N. E. (2003). The ErbB receptors and their role in cancer progression. *Exp. Cell Res.* **284**, 99-110.
- Horowitz, A., Tkachenko, E. and Simons, M. (2002). Fibroblast growth factor-specific modulation of cellular response by syndecan-4. *J. Cell Biol.* **157**, 715-725.
- Inui, S., Higashiyama, S., Hashimoto, K., Higashiyama, M., Yoshikawa, K. and Taniguchi, N. (1997). Possible role of coexpression of CD9 with membrane-anchored heparin-binding EGF-like growth factor and amphiregulin in cultured human keratinocyte growth. *J. Cell. Physiol.* **171**, 291-298.
- Kenny, P. A. and Bissell, M. J. (2007). Targeting TACE-dependent EGFR ligand shedding in breast cancer. *J. Clin. Invest.* **117**, 337-345.
- Kersey, J. H., LeBien, T. W., Abramson, C. S., Newman, R., Sutherland, R. and Greaves, M. (1981). P-24: a human leukemia-associated and lymphohemopoietic progenitor cell surface structure identified with monoclonal antibody. *J. Exp. Med.* **153**, 726-731.
- Kuo, A., Zhong, C., Lane, W. S. and Derynck, R. (2000). Transmembrane transforming growth factor- $\alpha$  tethers to the PDZ domain-containing, Golgi membrane-associated protein p59/GRASP55. *EMBO J.* **19**, 6427-6439.
- Leavesley, D. I., Ferguson, G. D., Wayner, E. A. and Cheresch, D. A. (1992). Requirement of the integrin  $\beta$ 3 subunit for carcinoma cell spreading or migration on vitronectin and fibrinogen. *J. Cell Biol.* **117**, 1101-1107.
- Lee, D. C., Fenton, S. E., Berkowitz, E. A. and Hissong, M. A. (1995). Transforming growth factor  $\alpha$ : expression, regulation, and biological activities. *Pharmacol. Rev.* **47**, 51-85.
- Lee, P. S., Chang, C., Liu, D. and Derynck, R. (2003). Sumoylation of Smad4, the common Smad mediator of transforming growth factor- $\beta$  family signaling. *J. Biol. Chem.* **278**, 27853-27863.
- Levy, S. and Shoham, T. (2005). The tetraspanin web modulates immune-signalling complexes. *Nat. Rev. Immunol.* **5**, 136-148.
- Lipschutz, J. H., O'Brien, L. E., Altschuler, Y., Avrahami, D., Nguyen, Y., Tang, K. and Mostov, K. E. (2001). Analysis of membrane traffic in polarized epithelial cells. *Curr. Protoc. Cell Biol.* Chapter 15, Unit 15.5.
- Longhurst, C. M., Jacobs, J. D., White, M. M., Crossno, J. T., Jr, Fitzgerald, D. A., Bao, J., Fitzgerald, T. J., Raghov, R. and Jennings, L. K. (2002). Chinese hamster ovary cell motility to fibronectin is modulated by the second extracellular loop of CD9. Identification of a putative fibronectin binding site. *J. Biol. Chem.* **277**, 32445-32452.
- Miyoshi, E., Higashiyama, S., Nakagawa, T., Hayashi, N. and Taniguchi, N. (1997). Membrane-anchored heparin-binding epidermal growth factor-like growth factor acts as a tumor survival factor in a hepatoma cell line. *J. Biol. Chem.* **272**, 14349-14355.
- O'Brien, L. E., Jou, T. S., Pollack, A. L., Zhang, Q., Hansen, S. H., Yurchenco, P. and Mostov, K. E. (2001). Rac1 orientates epithelial apical polarity through effects on basolateral laminin assembly. *Nat. Cell Biol.* **3**, 831-838.
- O'Brien, L. E., Yu, W., Tang, K., Jou, T. S., Zegers, M. M. and Mostov, K. E. (2006). Morphological and biochemical analysis of Rac1 in three-dimensional epithelial cell cultures. *Meth. Enzymol.* **406**, 676-691.
- Perez-Castro, C., Piscopo, D., Nakagawa, T. and Derynck, R. (2007). Cornichon regulates transport and secretion of TGF- $\alpha$ -related proteins in metazoan cells. *J. Cell Sci.* **120**, 2454-2466.
- Shi, W., Fan, H., Shum, L. and Derynck, R. (2000). The tetraspanin CD9 associates with transmembrane TGF- $\alpha$  and regulates TGF- $\alpha$ -induced EGF receptor activation and cell proliferation. *J. Cell Biol.* **148**, 591-602.
- Shoham, T., Rajapaksa, R., Kuo, C. C., Haimovich, J. and Levy, S. (2006). Building of the tetraspanin web: distinct structural domains of CD81 function in different cellular compartments. *Mol. Cell Biol.* **26**, 1373-1385.
- Shum, L., Reeves, S. A., Kuo, A. C., Fromer, E. S. and Derynck, R. (1994). Association of the transmembrane TGF- $\alpha$  precursor with a protein kinase complex. *J. Cell Biol.* **125**, 903-916.
- Sieg, D. J., Ilic, D., Jones, K. C., Damsky, C. H., Hunter, T. and Schlaepfer, D. D. (1998). Pyk2 and Src-family protein-tyrosine kinases compensate for the loss of FAK in fibronectin-stimulated signaling events but Pyk2 does not fully function to enhance FAK- cell migration. *EMBO J.* **17**, 5933-5947.
- Tu, L., Kong, X. P., Sun, T. T. and Kreibich, G. (2006). Integrity of all four transmembrane domains of the tetraspanin uroplakin Ib is required for its exit from the ER. *J. Cell Sci.* **119**, 5077-5086.
- Urban, S. (2006). Rhomboid proteases: conserved membrane proteases with divergent biological functions. *Genes Dev.* **20**, 3054-3068.
- Weaver, V. M., Petersen, O. W., Wang, F., Larabell, C. A., Briand, P., Damsky, C. and Bissell, M. J. (1997). Reversion of the malignant phenotype of human breast cells in three-dimensional culture and in vivo by integrin blocking antibodies. *J. Cell Biol.* **137**, 231-245.
- Williams, M. J. and Clark, P. (2003). Microscopic analysis of the cellular events during scatter factor/hepatocyte growth factor-induced epithelial tubulogenesis. *J. Anat.* **203**, 483-503.
- Wong, S. T., Winchell, L. F., McCune, B. K., Earp, H. S., Teixeira, J., Massague, J., Herman, B. and Lee, D. C. (1989). The TGF- $\alpha$  precursor expressed on the cell surface binds to the EGF receptor on adjacent cells, leading to signal transduction. *Cell* **56**, 495-506.
- Yanez-Mo, M., Tejedor, R., Rousselle, P. and Sanchez-Madrid, F. (2001). Tetraspanins in intercellular adhesion of polarized epithelial cells: spatial and functional relationship to integrins and cadherins. *J. Cell Sci.* **114**, 577-587.
- Yang, H., Jiang, D., Li, W., Liang, J., Gentry, L. E. and Brattain, M. G. (2000). Defective cleavage of membrane bound TGF $\alpha$  leads to enhanced activation of the EGF receptor in malignant cells. *Oncogene* **19**, 1901-1914.
